# Supplementary material
Source: Research Square preprint supplement (doi:10.21203/rs.3.rs-9641298/v1)
Supplement: Supplementary file 1 [file 97c9b1c3c2362871f550ce57.docx]

# **Supplementary Information**

**Table S1:** List of the tuned parameters employed with the Grid Search and Randomised Search hyperparameter tuning for decision tree, random forest, KNN, and linear regression models

| **Model** | **Tuning methods** | **Tunned parameters** |
| --- | --- | --- |
| Decision Tree | Grid Search | 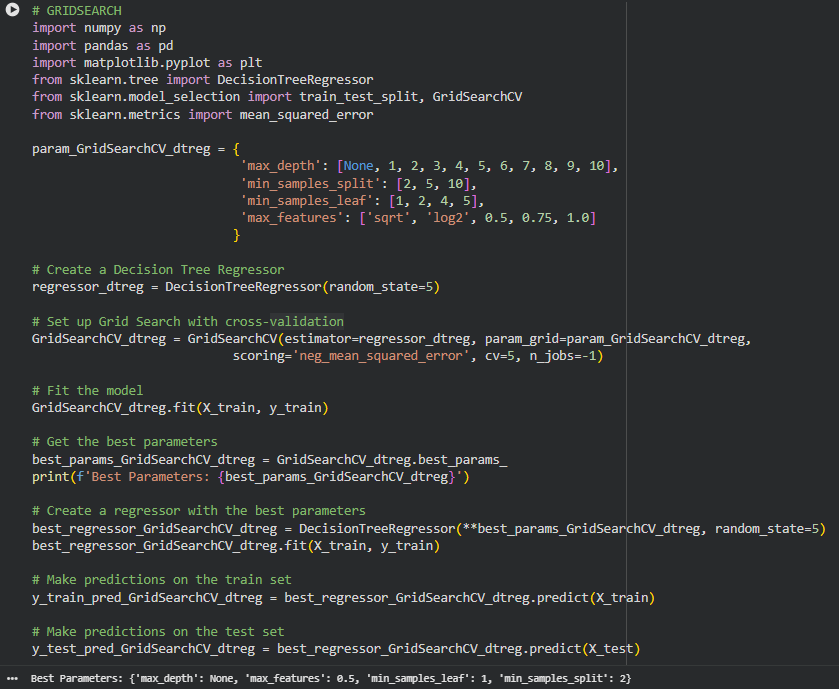 |
| Randomised Search | 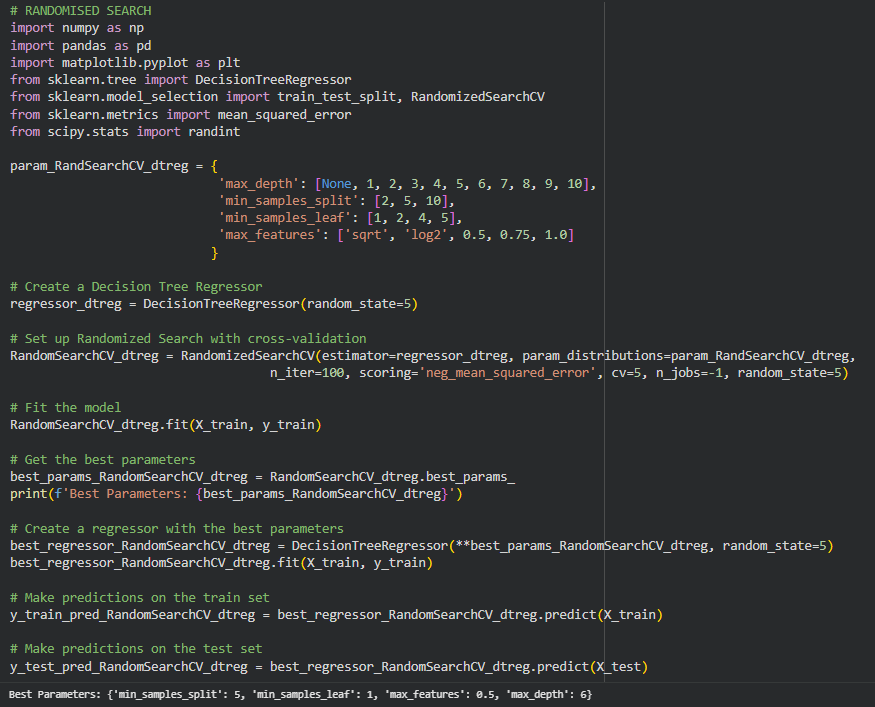 |
| Random Forest | Grid Search | 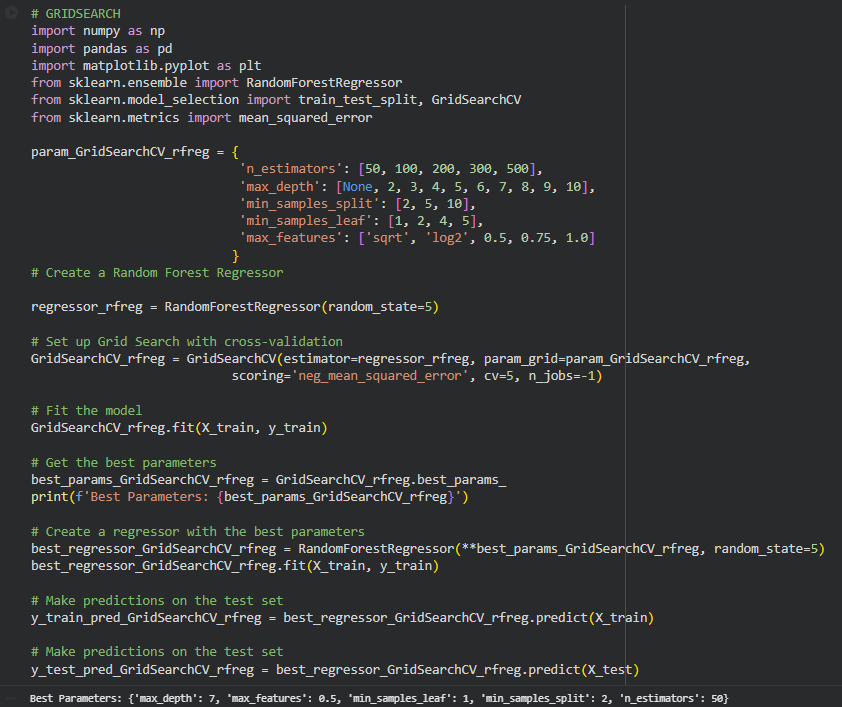 |
| Randomised Search | 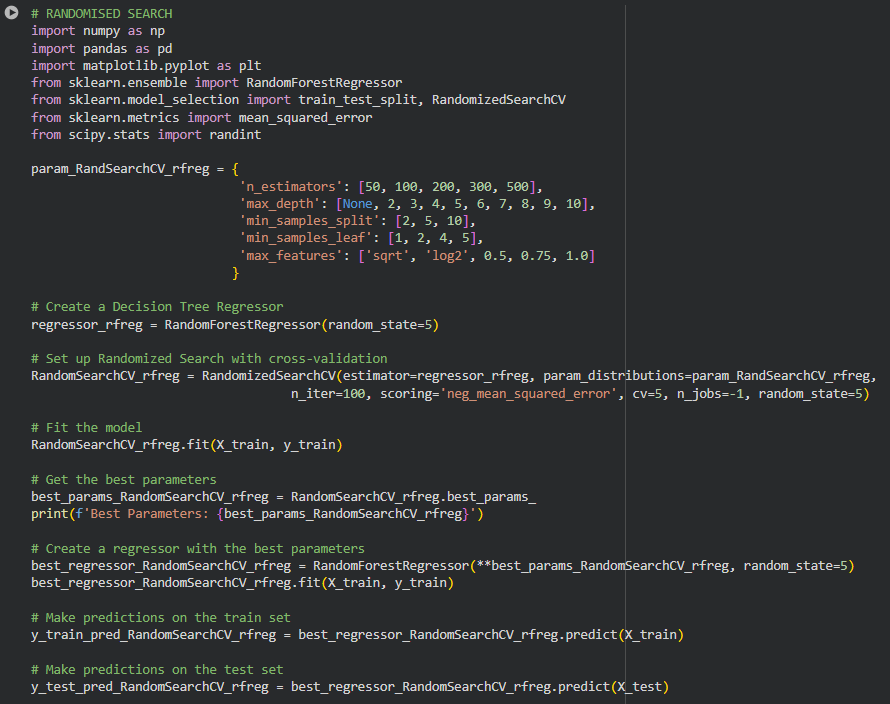 |
| KNN | Grid Search | 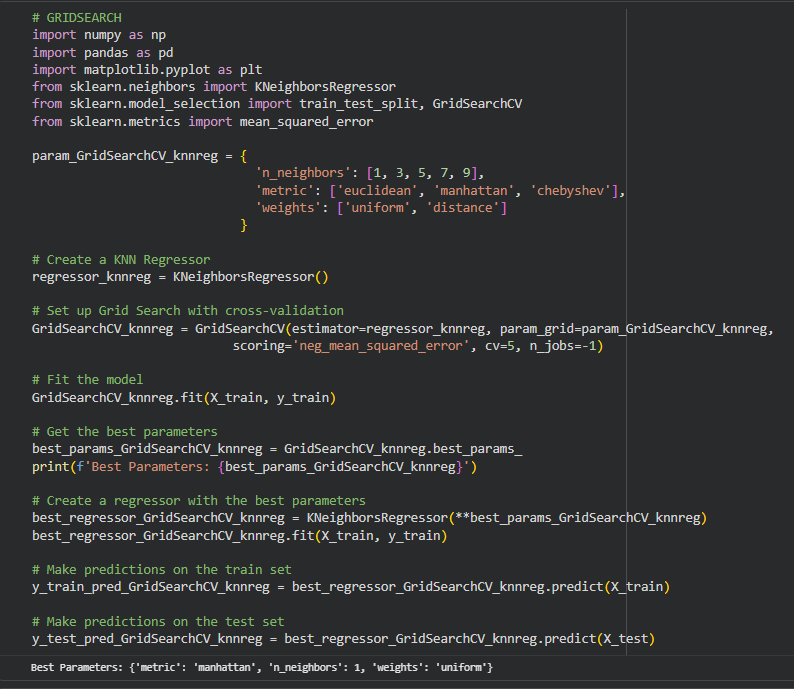 |
| Randomised Search | 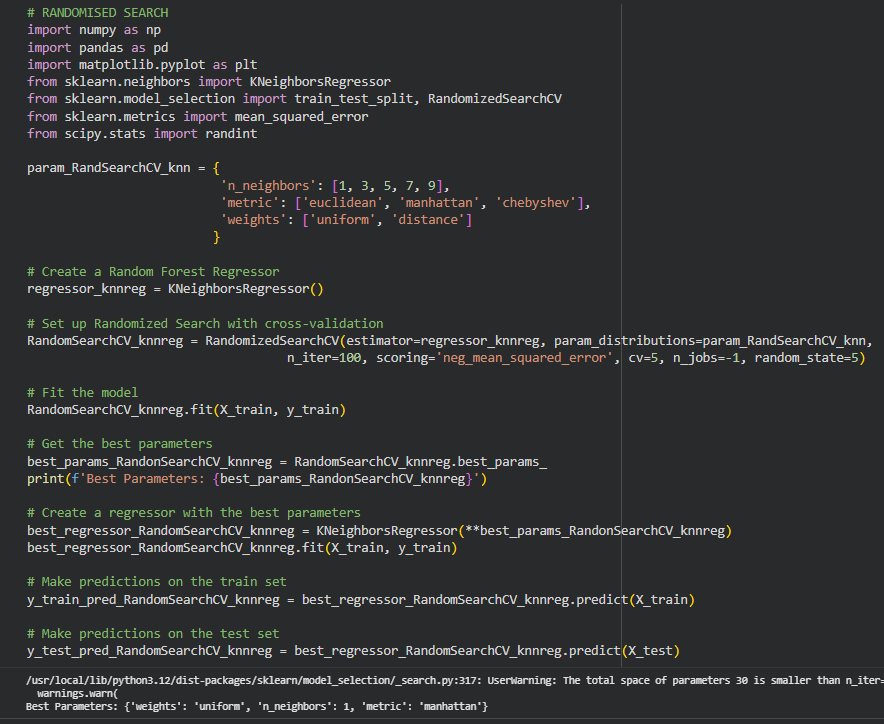 |
| Linear | Grid Search | 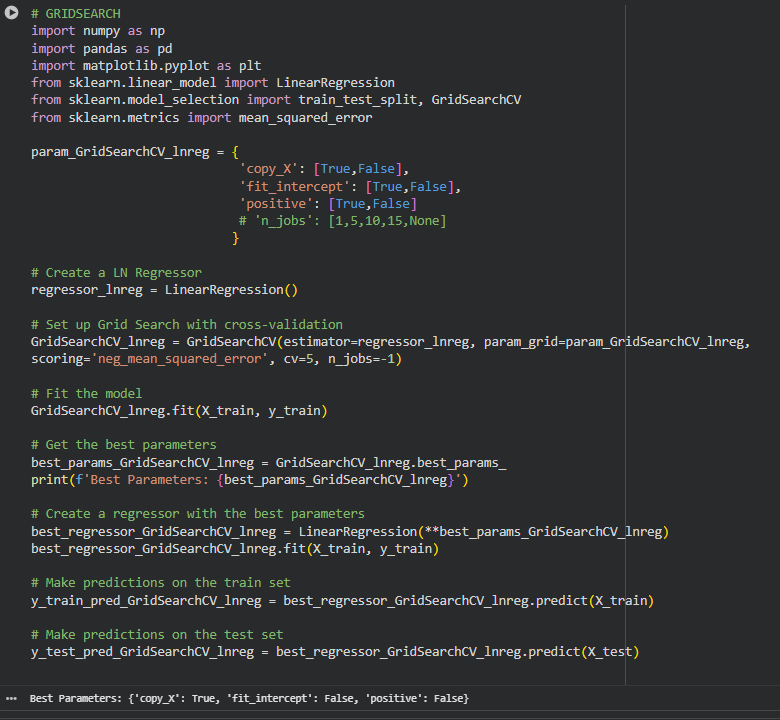 |
| Randomised Search | 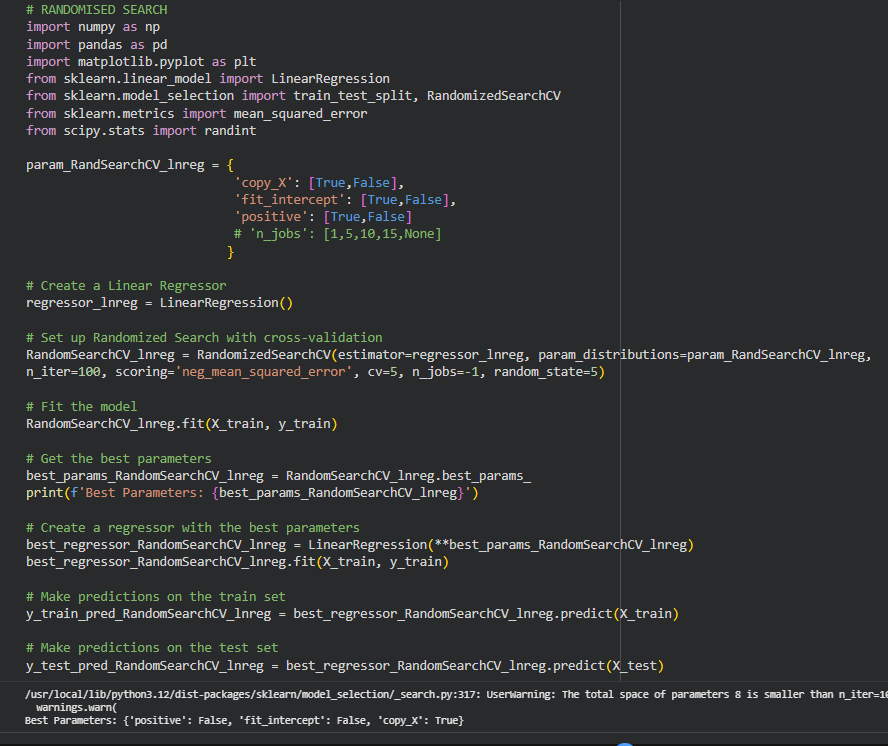 |


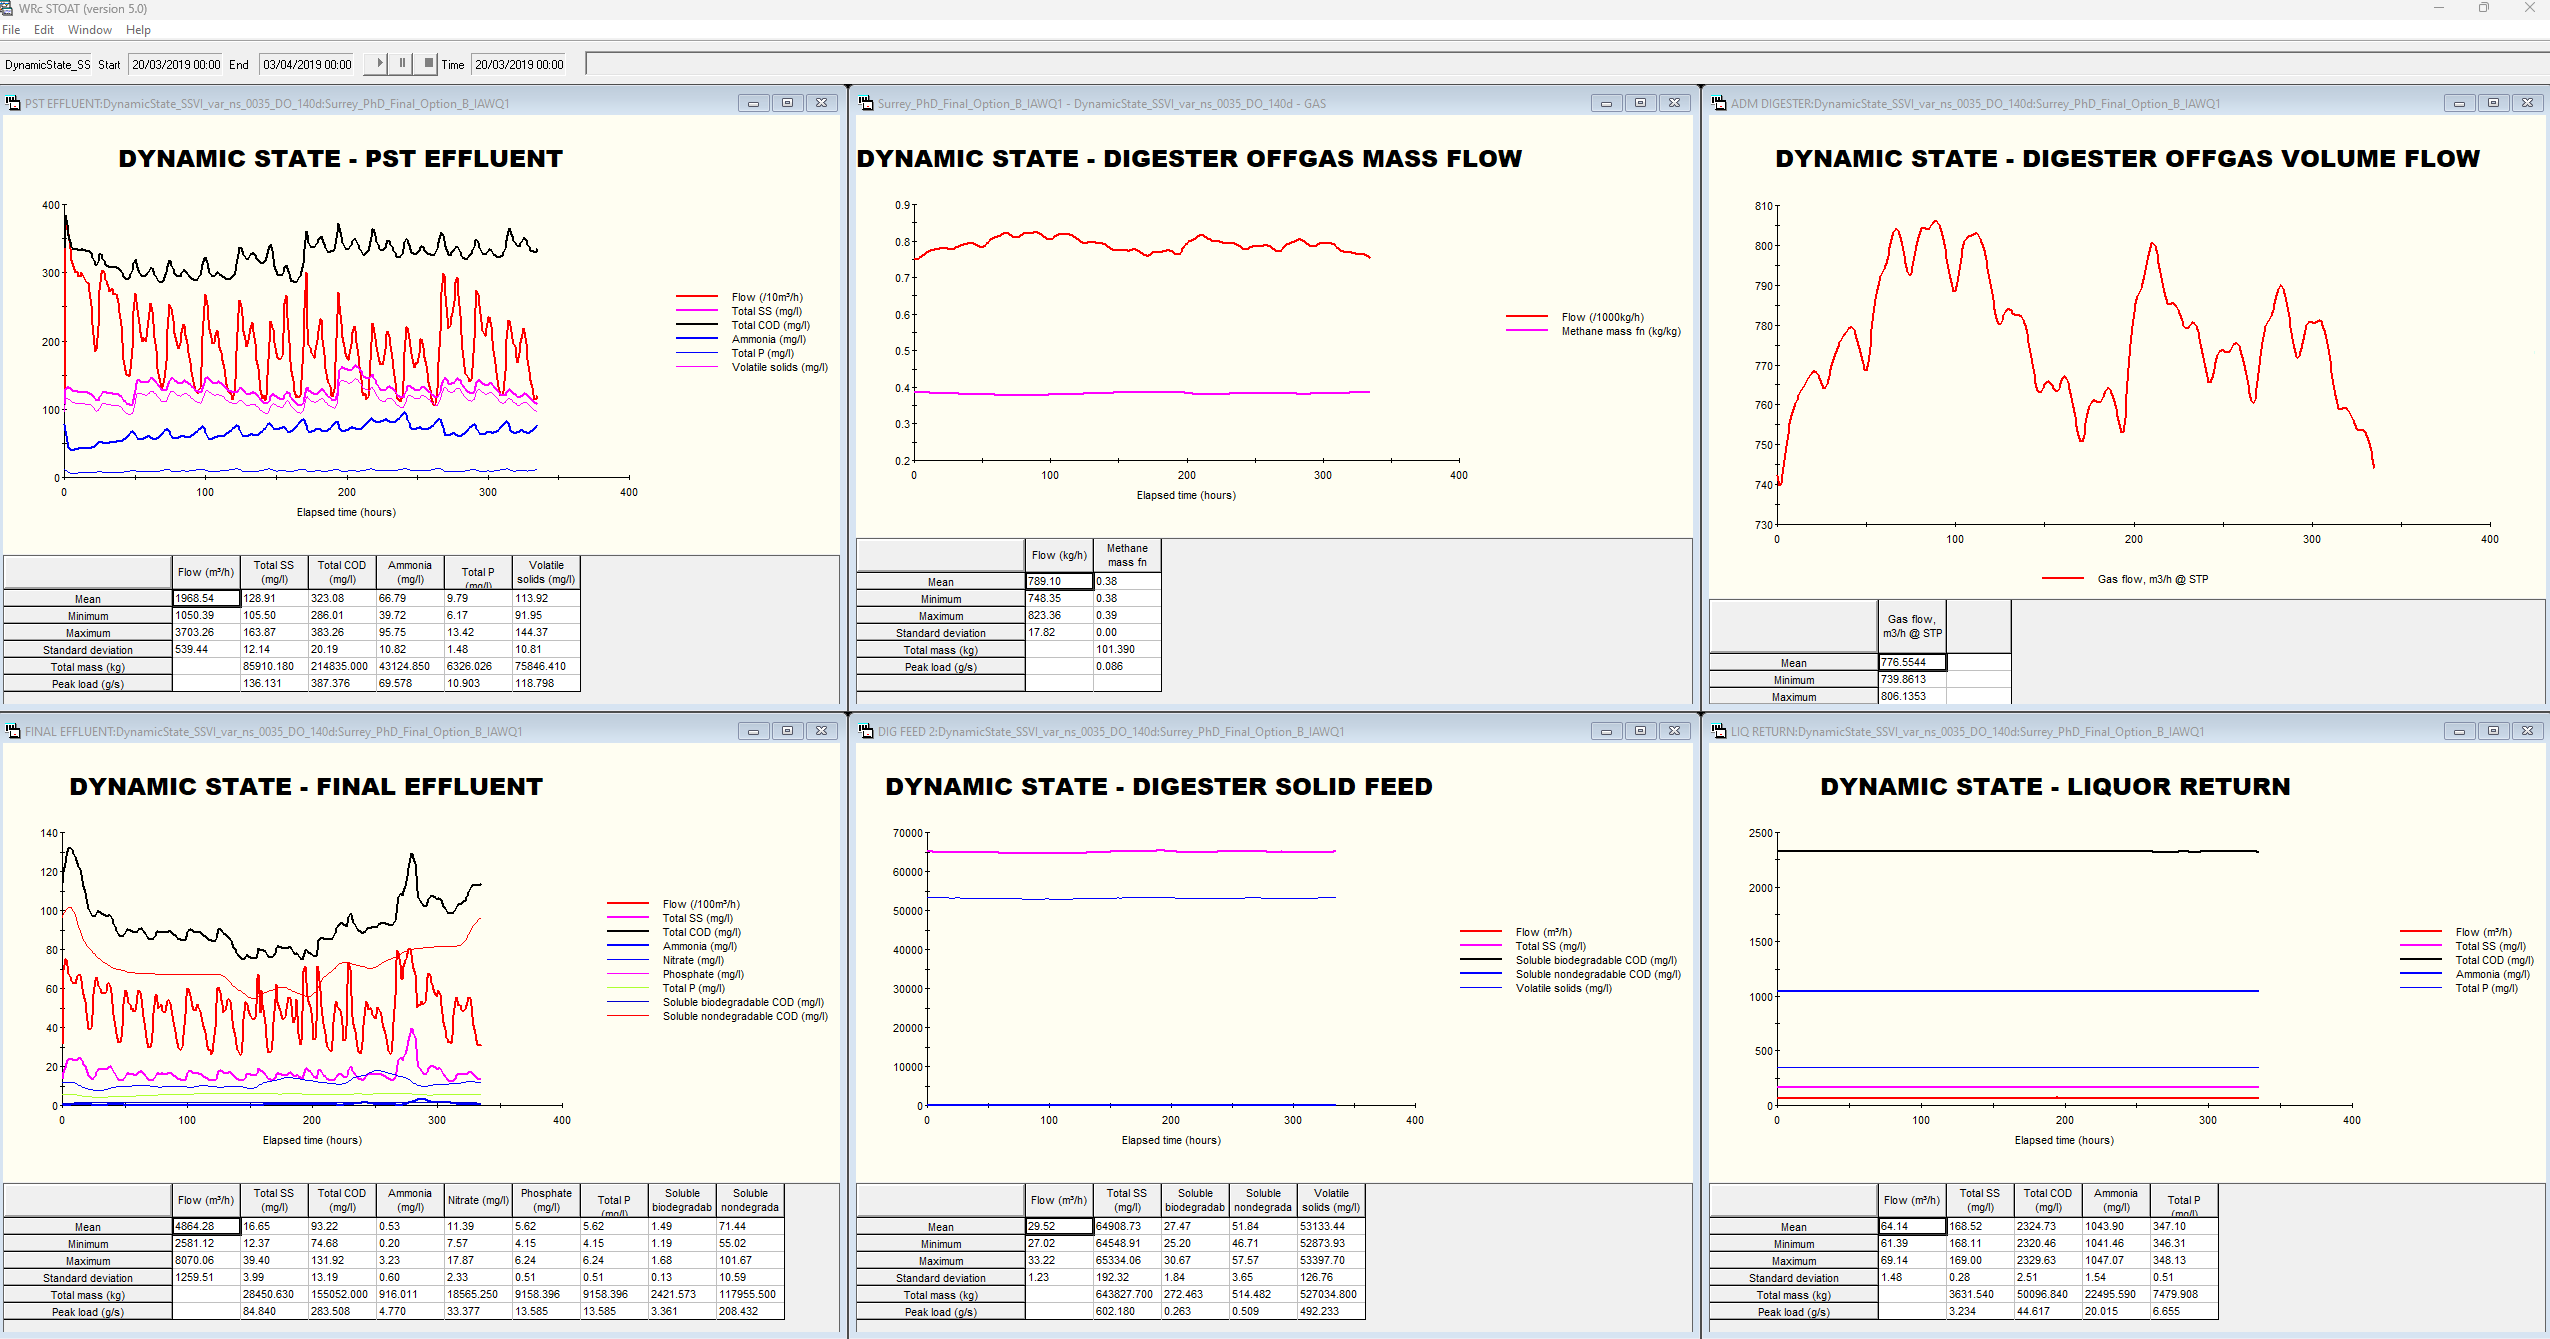


**Figure S1:** The result of dynamic state simulation from the STOAT modelling environment showing predictions for PST effluent, final effluent, digester performance, and liquor return quality.
